# Supplementary material
Source: PubMed Central journal article supplement (PMC4307945)
Supplement: NIHMS619513-supplement-01.pdf [file NIHMS619513-supplement-01.pdf]

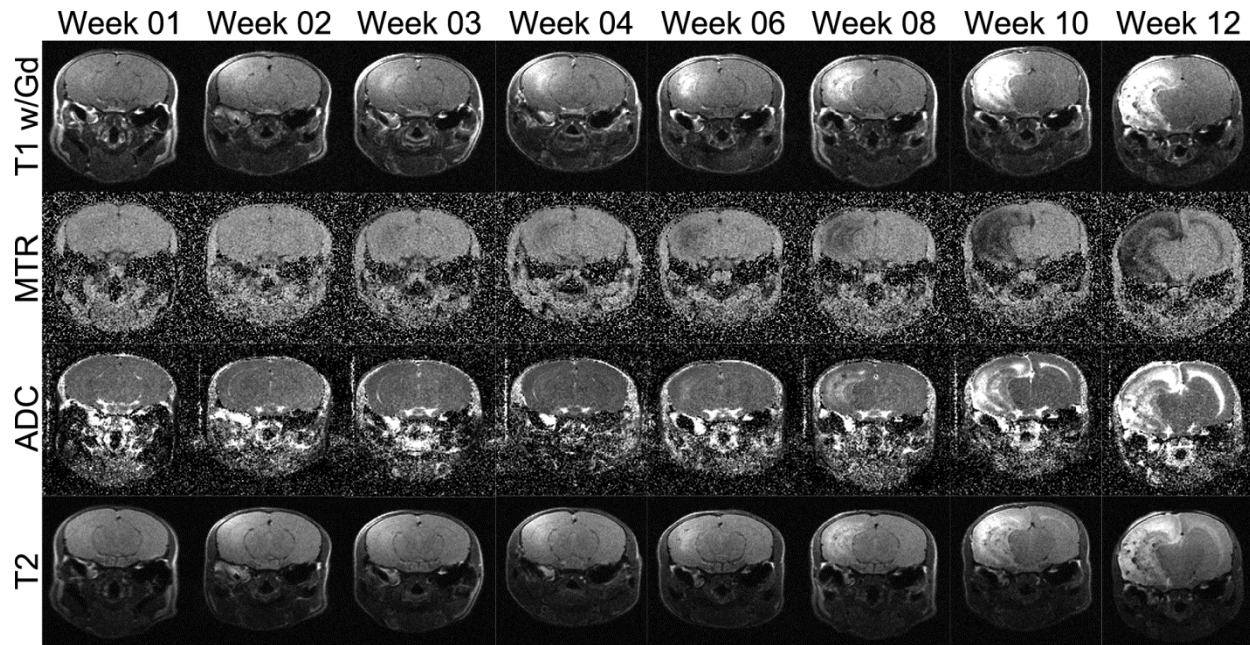

*Supplementary Figure 1.* Radiation model at all time points. Post-contrast T1-weighted (1<sup>st</sup> row), MTR map (2<sup>nd</sup> row), ADC map (3<sup>rd</sup> row), and T2-weighted (4<sup>th</sup> row) images of a representative mouse from week 1 (leftmost column) to week 12 (rightmost column) post-irradiation. The radiation injury can be identified as the bright region on post-contrast T1-weighted, ADC map, and T2 weighted; and the dark region on MTR map.

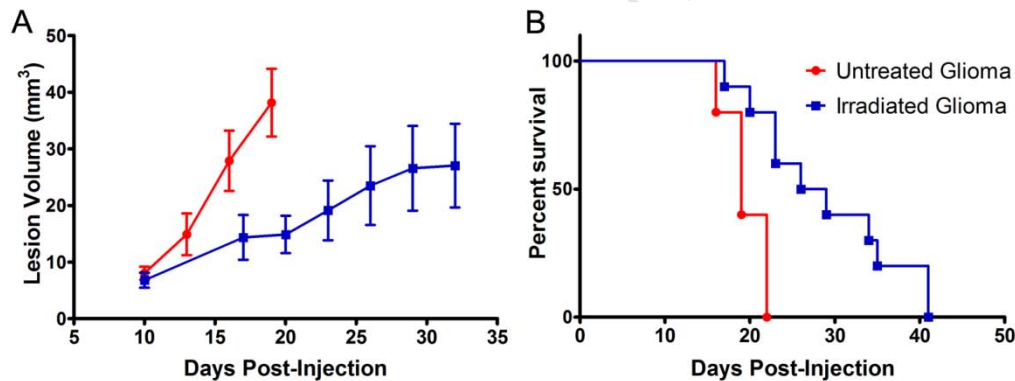

*Supplementary Figure 2.* Radiation Impacts Survival. Panel **A** shows the size of the tumor as derived from post-contrast T1-weighted images for untreated glioma and irradiated glioma models. For mice that died prematurely, their last observation was carried forward for the purposes of this graph. Data are shown as mean  $\pm$  SEM. Panel **B** shows the Kaplan-Meier survival curve between the same groups. Even though all mice succumbed to the glioma there is a marked survival difference with untreated glioma having a median survival of 19 days and irradiated glioma having a median survival of 27.5 days ( $P=0.001$  by Log-rank (Mantel-Cox) Test).
